# Supplementary material for: Safety and efficacy of robot-assisted bile ductoplasty and intrapancreatic bile duct resection in congenital biliary dilatation: a single-center retrospective cohort (2013–2024)
Source: Springer Nature journal article supplement (doi:10.1007/s11701-025-02782-8), 2025-09-18
Supplement: MOESM2 [file 11701_2025_2782_MOESM2_ESM.pdf]

**Supplementary Table 6** Characteristics and outcomes excluding non-dilatation type

|                                           | Rob (n = 53)  | Lap (n = 97)  | P value           |
|-------------------------------------------|---------------|---------------|-------------------|
| Male                                      | 17 (32%)      | 25 (26%)      | 1                 |
| Age (year)                                | 8 (2-24)      | 2 (1-6)       | <b>&lt; 0.001</b> |
| <1 year                                   | 7 (13%)       | 21 (22%)      |                   |
| 1–17 years                                | 27 (51%)      | 66 (68%)      |                   |
| ≥18 years                                 | 19 (36%)      | 10 (10%)      |                   |
| Body weight (kg)                          | 25 (12-52)    | 13 (9-21)     | <b>&lt; 0.001</b> |
| Todani classification                     |               |               | 0.070             |
| 1a                                        | 14 (26%)      | 17 (18%)      |                   |
| 1b                                        | 1 (1.9%)      | 0             |                   |
| 1c                                        | 12 (23%)      | 14 (14%)      |                   |
| IV-A                                      | 26 (49%)      | 66 (68%)      |                   |
| Perforation                               | 1 (1.9%)      | 4 (4.1%)      | 0.66              |
| Operative time (min)                      | 454 (367-556) | 410 (351-464) | <b>0.044</b>      |
| Blood loss (mL) <sup>a</sup>              | 24 (15-46)    | 38 (12-82)    | 0.12              |
| Bile ductoplasty                          | 28 (53%)      | 58 (60%)      | 0.49              |
| Early complication <sup>b</sup>           | 7 (13%)       | 8 (8.2%)      | 0.40              |
| Length of hospital stay (day)             | 8 (7-11)      | 10 (8-13)     | <b>&lt; 0.001</b> |
| Period until enteral feeding starts (day) | 3 (3-4)       | 4 (3-5)       | <b>&lt; 0.001</b> |
| Duration of drain placement (day)         | 5 (5-7)       | 6 (6-7)       | <b>0.002</b>      |
| Late complication (CD ≥I) <sup>c</sup>    | 2 (3.8%)      | 18 (19%)      | <b>0.011</b>      |
| Late complication (CD ≥III) <sup>d</sup>  | 1 (1.9%)      | 12 (1.0%)     | <b>0.033</b>      |
| Residual intrapancreatic bile duct (mm)   | 0 (0-5)       | 0 (0-0)       | 0.077             |
| Cholangiocarcinoma                        | 0             | 0             |                   |

Values are present as n (%) or median (interquartile range). Bold value indicates significant difference.

P values are two-sided.

Rob: Patients underwent robotic-assisted surgery

Lap: Patients underwent laparoscopic surgery

a: Blood loss was measured intraoperatively

b: Complications within 30 days after surgery and Clavien-Dindo classification III or higher

c: Complications 31 days or more after surgery and Clavien-Dindo classification I or higher including events treated conservatively

d: Complications 31 days or more after surgery and Clavien-Dindo classification III or higher including events treated conservatively

**Title:**

Safety and efficacy of robot-assisted bile ductoplasty and intrapancreatic bile duct resection in congenital biliary dilatation: a single-center retrospective cohort (2013–2024)

**Journal:**

Journal of Robotic Surgery

**Authors:**

Daiki Kato, Chiyo Shirota, Hiroo Uchida, Akinari Hinoki, Satoshi Makita, Katsuhiro Ogawa, Masamune Okamoto, Akihiro Yasui, Shunya Takada, Kaito Hayashi, Yoichi Nakagawa, Hiroki Ishii, Hajime Asai, Hizuru Amano, and Takahisa Tainaka

**Affiliation:**

Department of Pediatric Surgery, Nagoya University Graduate School of Medicine, 65 Tsurumai-cho, Showa-ku, Nagoya 466-8550, Japan

**Correspondence to:**

Takahisa Tainaka, MD, PhD

Department of Pediatric Surgery Nagoya University Graduate School of Medicine 65 Tsurumai-cho, Showa-ku, Nagoya 466-8550, Japan

Email: [tainaka.takahisa.g2@f.mail.nagoya-u.ac.jp](mailto:tainaka.takahisa.g2@f.mail.nagoya-u.ac.jp)

Tel: +81-52-744-2959 Fax: +81-52-744-2980
