# Supplementary material for: Safety and efficacy of robot-assisted bile ductoplasty and intrapancreatic bile duct resection in congenital biliary dilatation: a single-center retrospective cohort (2013–2024)
Source: Springer Nature journal article supplement (doi:10.1007/s11701-025-02782-8), 2025-09-18
Supplement: MOESM8 [file 11701_2025_2782_MOESM8_ESM.pdf]

1 **Supplementary Information. 2**

2 The robot-assisted surgical procedures

3

4 Robot-assisted surgery followed the same fundamental surgical procedures, with adjustments in port  
5 placement. The da Vinci Surgical System Xi was used with either a four plus one ports or a three plus  
6 one ports with a multichannel port. For the five-port method, an 8-mm 3D camera port (R3) was inserted  
7 at the umbilicus, and three 8-mm robotic ports were placed (R1 and R2 on the right lower abdomen and  
8 R4 on the left upper abdomen), with a 12-mm assistant port (As) in the left lower abdomen. For the four-  
9 port method, a multichannel port was inserted at the umbilicus with an 8-mm 3D camera port (R2). In  
10 addition, two 8-mm ports were inserted on either side of the abdomen. A 5-mm assistant port was inserted  
11 into the left lower abdomen.

12

13 **Title:**

14 Safety and efficacy of robot-assisted bile ductoplasty and intrapancreatic bile duct resection in congenital  
15 biliary dilatation: [a single-center retrospective cohort \(2013–2024\)](#)

16

17 **Journal:**

18 Journal of Robotic Surgery

19

20 **Authors:**

21 Daiki Kato, Chiyoe Shirota, Hiroo Uchida, Akinari Hinoki, Satoshi Makita, Katsuhiro Ogawa,  
22 Masamune Okamoto, Akihiro Yasui, Shunya Takada, Kaito Hayashi, Yoichi Nakagawa, Hiroki Ishii,  
23 Hajime Asai, Hizuru Amano, and Takahisa Tainaka

24

25 **Affiliation:**

26 Department of Pediatric Surgery, Nagoya University Graduate School of Medicine, 65 Tsurumai-cho,  
27 Showa-ku, Nagoya 466-8550, Japan

28

29 **Correspondence to:**

30 Takahisa Tainaka, MD, PhD

31 Department of Pediatric Surgery Nagoya University Graduate School of Medicine 65 Tsurumai-cho,  
32 Showa-ku, Nagoya 466-8550, Japan  
33 Email: [tainaka.takahisa.g2@f.mail.nagoya-u.ac.jp](mailto:tainaka.takahisa.g2@f.mail.nagoya-u.ac.jp)  
34 Tel: +81-52-744-2959 Fax: +81-52-744-2980
