# Supplementary material for: Safety and efficacy of robot-assisted bile ductoplasty and intrapancreatic bile duct resection in congenital biliary dilatation: a single-center retrospective cohort (2013–2024)
Source: Springer Nature journal article supplement (doi:10.1007/s11701-025-02782-8), 2025-09-18
Supplement: MOESM9 [file 11701_2025_2782_MOESM9_ESM.pdf]

**Supplementary Table 1** Surgical outcomes of the patients with and without bile ductoplasty

|                                 | bile ductoplasty + (n = 87) | bile ductoplasty - (n = 72) | P value      |
|---------------------------------|-----------------------------|-----------------------------|--------------|
| Procedure                       |                             |                             | 0.51         |
| Robot-assisted surgery          | 29 (33%)                    | 28 (39%)                    |              |
| Laparoscopic surgery            | 58 (67%)                    | 44 (61%)                    |              |
| Operative time (min)            | 438 (364-544)               | 389 (345-448)               | <b>0.011</b> |
| Blood loss (mL) <sup>a</sup>    | 37 (12-80)                  | 30 (19-62)                  | 0.94         |
| Early complication <sup>b</sup> | 7 (12%)                     | 8 (7.8%)                    | 0.59         |
| Bile leakage                    | 5 <sup>c</sup>              | 4                           |              |
| Pancreatic fistula              | 3 <sup>c</sup>              | 2                           |              |
| Bowel obstruction               | 1                           | 1                           |              |
| Roux-en-Y limb dilatation       | 0                           | 1                           |              |
| Hepatitis                       | 4                           | 3                           | 1            |
| Cholangitis                     | 6                           | 7                           | 0.57         |

Values are present as n (%) or median (interquartile range). Bold value indicates significant difference.

*P* values are two-sided.

a: Blood loss was measured intraoperatively

b: Complications within 30 days after surgery and Clavien-Dindo classification III or higher

c: The two patients developed bile leakage and pancreatic fistula

**Title:**

Safety and efficacy of robot-assisted bile ductoplasty and intrapancreatic bile duct resection in congenital biliary dilatation: a single-center retrospective cohort (2013–2024)

**Journal:**

Journal of Robotic Surgery

**Authors:**

Daiki Kato, Chiyo Shirota, Hiroo Uchida, Akinari Hinoki, Satoshi Makita, Katsuhiro Ogawa, Masamune

Okamoto, Akihiro Yasui, Shunya Takada, Kaito Hayashi, Yoichi Nakagawa, Hiroki Ishii, Hajime Asai,  
Hizuru Amano, and Takahisa Tainaka

**Affiliation:**

Department of Pediatric Surgery, Nagoya University Graduate School of Medicine, 65 Tsurumai-cho,  
Showa-ku, Nagoya 466-8550, Japan

**Correspondence to:**

Takahisa Tainaka, MD, PhD

Department of Pediatric Surgery Nagoya University Graduate School of Medicine 65 Tsurumai-cho,  
Showa-ku, Nagoya 466-8550, Japan

Email: [tainaka.takahisa.g2@f.mail.nagoya-u.ac.jp](mailto:tainaka.takahisa.g2@f.mail.nagoya-u.ac.jp)

Tel: +81-52-744-2959 Fax: +81-52-744-2980
