# Supplementary material for: Safety and efficacy of robot-assisted bile ductoplasty and intrapancreatic bile duct resection in congenital biliary dilatation: a single-center retrospective cohort (2013–2024)
Source: Springer Nature journal article supplement (doi:10.1007/s11701-025-02782-8), 2025-09-18
Supplement: MOESM12 [file 11701_2025_2782_MOESM12_ESM.pdf]

**Supplementary Table 4** Cox regression analysis for predictors of time to enteral feeding

|                                 | HR           | 95% CI               | P value      |
|---------------------------------|--------------|----------------------|--------------|
| Age (Y)                         | 1.000        | 0.978 - 1.024        | 0.95         |
| Body weight (kg)                | 0.991        | 0.976 - 1.007        | 0.26         |
| Todani classification type IV-A | 0.979        | 0.695 - 1.379        | 0.90         |
| Perforation                     | 0.999        | 0.400 - 2.454        | 1            |
| Approach (robot-assisted)       | <b>1.602</b> | <b>1.106 - 2.322</b> | <b>0.013</b> |
| Bile ductoplasty                | 0.762        | 0.550 - 1.057        | 0.10         |

Bold value indicates significant difference.

*P* values are two-sided.

HR: Hazard ratio

CI: Confidence interval

**Title:**

Safety and efficacy of robot-assisted bile ductoplasty and intrapancreatic bile duct resection in congenital biliary dilatation: a single-center retrospective cohort (2013–2024)

**Journal:**

Journal of Robotic Surgery

**Authors:**

Daiki Kato, Chiyo Shirota, Hiroo Uchida, Akinari Hinoki, Satoshi Makita, Katsuhiro Ogawa, Masamune Okamoto, Akihiro Yasui, Shunya Takada, Kaito Hayashi, Yoichi Nakagawa, Hiroki Ishii, Hajime Asai, Hizuru Amano, and Takahisa Tainaka

**Affiliation:**

Department of Pediatric Surgery, Nagoya University Graduate School of Medicine, 65 Tsurumai-cho, Showa-ku, Nagoya 466-8550, Japan

**Correspondence to:**

Takahisa Tainaka, MD, PhD

Department of Pediatric Surgery Nagoya University Graduate School of Medicine 65 Tsurumai-cho,  
Showa-ku, Nagoya 466-8550, Japan

Email: [tainaka.takahisa.g2@f.mail.nagoya-u.ac.jp](mailto:tainaka.takahisa.g2@f.mail.nagoya-u.ac.jp)

Tel: +81-52-744-2959 Fax: +81-52-744-2980
